# Supplementary material
Source: HighWire-hosted journal article supplement (https://diabetes.diabetesjournals.org/content/suppl/2014/07/18/db13-1747)

SUPPLEMENTARY DATA

**Supplementary Table 1.** Quantitative PCR Primer sequences:

|                 |                                                                          |
|-----------------|--------------------------------------------------------------------------|
| <i>Acc</i>      | F: TAA TGG GCT GCT TCT GTG ACT C<br>R: CTC AAT ATC GCC ATC AGT CTT G     |
| <i>Acox</i>     | F: GTC GAC CTT GTT CGC CA<br>R: GGT TCC TCA GCA CGG CTT                  |
| <i>Arg-1</i>    | F: ATG GAA GAG ACC TTC AGC TAC<br>R: GCT GTC TTC CCA AGA GTT GGG         |
| <i>36b4</i>     | F: AGA TGC AGC AGA TCC GCA T<br>R: GTT CTT GCC CAT CAG CAC C             |
| <i>Cd11c</i>    | F: ACA CAG TGT GCT CCA GTA TGA<br>R: GCC CAG GGA TAT GTT CAC AGC         |
| <i>Chga</i>     | F: AGG AGC GTC TGT CCA GAG AA<br>R: CAG GCT CTC TAG CTC CTG GT           |
| <i>Cpt1</i>     | F: CAG GAT TTT GCT GTC AAC CTC<br>R: GAG CAT CTC CAT GGC GTA G           |
| <i>Gapdh</i>    | F: TAT GTC GTGGAG TCT ACT GGT GT<br>R: GTC ATC ATA CTT GGC AGG TTT CT    |
| <i>G6Pase</i>   | F: GTT GAA CCA GTC TCC GAC CA<br>R: CGA CTC GCT ATC TCC AAG TGA          |
| <i>IL-1b</i>    | F: AAA TAC CTG TGG CCT TGG GC<br>R: CTT GGG ATC CAC ACT CTC CAG          |
| <i>IL-6</i>     | F: CCA GAG ATA CAA AGA AAT GAT GG<br>R: ACT CCA GAA GAC CAG AGG AAA T    |
| <i>IL-10</i>    | F: TGA ATT CCC TGG GTG AGA AG<br>R: TCA CTC TTC ACC TGC TCC ACT          |
| <i>IL-12p40</i> | F: CCA GAG ACA TGG AGT CAT AG<br>R: AGA TGT GAG TGG CTC AGA GT           |
| <i>iNos</i>     | F: GAG GCC CAG GAG GAG AGA GAT CCG<br>R: TCC ATG CAG ACA ACC TTG GTG TTG |
| <i>Mcp-1</i>    | F: AGG TCC CTG TCA TGC TTC TG<br>R: GCT GCT GGT GAT CCT CTT GT           |

## SUPPLEMENTARY DATA

|                 |                                                                        |
|-----------------|------------------------------------------------------------------------|
| <i>Mgl-1</i>    | F: ATG ATG TCT GCC AGA GAA CC<br>R: ATC ACA GAT TTC AGC AAC CTT A      |
| <i>Mgl-2</i>    | F: CAG AAC TTG GAG CGG GAA GAG<br>R: TTC TTG TCA CCA TTT CTC ATC TCC T |
| <i>Pepck</i>    | F: CTG CAT AAC GGT CTG GAC TTC<br>R: CAG CAA CTG CCC GTA CTC C         |
| <i>Srebp-1c</i> | F: GGA GCC ATG GAT TGC ACA TT<br>R: CTT CCA GAG AGG AGG CCA G          |
| <i>Tnfa</i>     | F: CCA GAC CCT CAC ACT CAG ATC<br>R: CAC TTG GTG GTT TGC TAC GAC       |
| <i>Ym1</i>      | F: GGG CAT ACC TTT ATC CTG AG<br>R: CCA CTG AAG TCA TCC ATG TC         |

**Supplementary Figure 1. GTT and ITT in mice with C57BL/6 genetic background.** Three month old WT and *Chga*-KO mice were fed HFD for 12 weeks. Body weight-matched mice were fasted for 12 hrs and subjected to IP-GTT (A) and ITT (C) and the corresponding AUCs for glucose excursions were determined (B&D). (E) Four month old *Chga*-KO mice were fed HFD for 12 months, fasted for 12 hrs, injected with PST (5 µg/g BW, IP) at -30 min and subjected to GTT after injecting glucose at 0 min. \*: P<0.05, \*\*: p< 0.01, \*\*\*: p<0.001.

SUPPLEMENTARY DATA

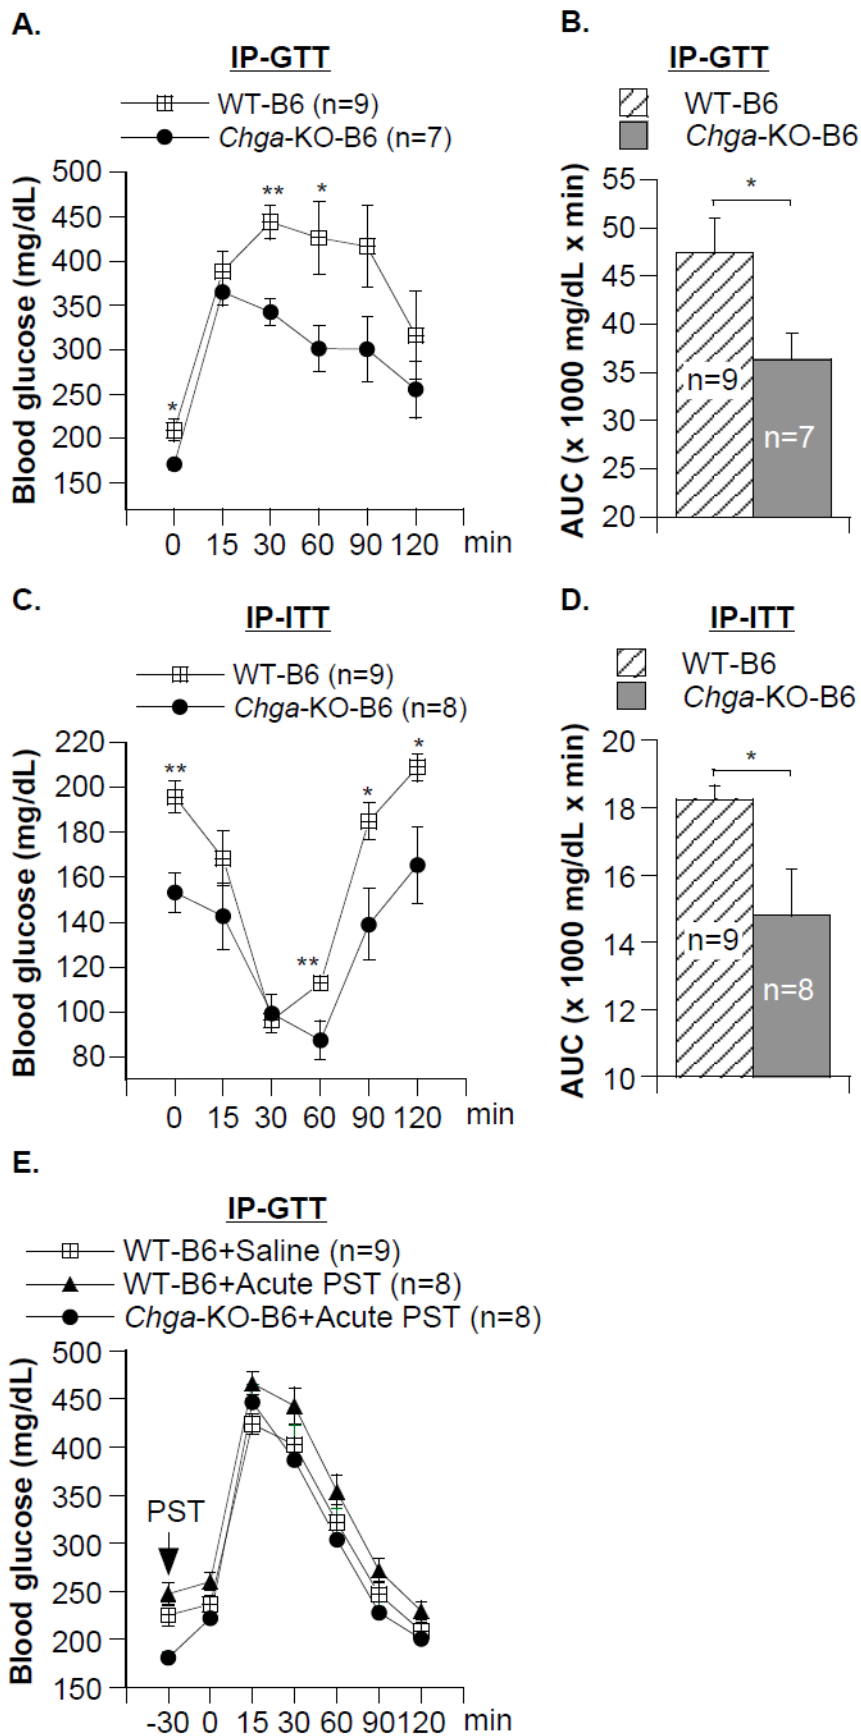

Supplement: DB131747SupplementaryData.pdf [file DB131747SupplementaryData.pdf]
